# Supplementary material for: Tuning cadmium coordination architectures using 1,4-bis(1,2,4-triazol-1-ylmethyl)benzene and sulfoisophthalate
Source: Royal Society of Chemistry journal article supplement (doi:10.1039/c4ra02291b), 2014-01-01
Supplement: c4ra02291b1.pdf [file c4ra02291b1.pdf]

## Supporting Materials

### Tuning cadmium coordination architectures by 1,4-bis(1,2,4-triazol-1-ylmethyl)benzene and sulfoisophthalate

Jian-Gang Ding, Cao Yin, Ling-Yun Zheng, Shan-Shan Han, Bao-Long Li\*, Bing Wu  
Key Laboratory of Organic Synthesis of Jiangsu Province, College of Chemistry,  
Chemical Engineering and Materials Science, Soochow University, Suzhou 215123, P.  
R. China

**Table S1** Selected bond lengths [Å] and angles [°] for **1**, **2** and **3**.

| <b>1</b>           |            |                     |            |
|--------------------|------------|---------------------|------------|
| Cd(1)-N(3)         | 2.287(6)   | Cd(1)-O(8)          | 2.322(7)   |
| Cd(1)-O(9)         | 2.290(6)   | Cd(2)-O(1)          | 2.298(5)   |
| Cd(2)-O(2)         | 2.555(4)   | Cd(2)-O(3)#2        | 2.532(4)   |
| Cd(2)-O(4)#2       | 2.403(5)   | Cd(2)-N(6)          | 2.325(6)   |
| Cd(2)-N(9)         | 2.294(6)   | Cd(2)-N(12)         | 2.341(6)   |
| N(3)-Cd(1)-N(3)#1  | 180.000(1) | O(9)#1-Cd(1)-O(9)   | 180.00(7)  |
| O(8)#1-Cd(1)-O(8)  | 180.000(3) | N(3)-Cd(1)-O(8)     | 84.7(2)    |
| N(3)-Cd(1)-O(9)    | 87.0(2)    | O(9)-Cd(1)-O(8)     | 91.4(3)    |
| O(1)-Cd(2)-O(2)    | 52.81(17)  | O(1)-Cd(2)-O(3)#2   | 133.06(17) |
| O(1)-Cd(2)-O(4)#2  | 81.00(17)  | O(3)#2-Cd(2)-O(2)   | 173.58(16) |
| O(4)#2-Cd(2)-O(2)  | 133.37(16) | O(4)#2-Cd(2)-O(3)#2 | 52.89(16)  |
| O(1)-Cd(2)-N(6)    | 89.6(2)    | N(9)-Cd(2)-O(1)     | 144.01(18) |
| O(1)-Cd(2)-N(12)   | 84.2(2)    | N(6)-Cd(2)-O(2)     | 92.26(18)  |
| N(9)-Cd(2)-O(2)    | 91.36(17)  | N(12)-Cd(2)-O(2)    | 83.89(18)  |
| N(6)-Cd(2)-O(3)#2  | 85.48(18)  | N(9)-Cd(2)-O(3)#2   | 82.91(18)  |
| N(12)-Cd(2)-O(3)#2 | 98.84(18)  | N(6)-Cd(2)-O(4)#2   | 93.60(19)  |
| N(9)-Cd(2)-O(4)#2  | 133.82(18) | N(12)-Cd(2)-O(4)#2  | 85.66(18)  |
| N(9)-Cd(2)-N(6)    | 95.7(2)    | N(6)-Cd(2)-N(12)    | 173.9(2)   |
| N(9)-Cd(2)-N(12)   | 89.2(2)    |                     |            |
| <b>2</b>           |            |                     |            |
| Cd(1)-O(1)         | 2.621(3)   | Cd(1)-O(2)          | 2.320(3)   |
| Cd(1)-O(4)#1       | 2.293(2)   | Cd(1)-O(8)          | 2.345(3)   |
| Cd(1)-N(3)         | 2.289(3)   | Cd(1)-N(9)          | 2.327(3)   |

|                     |            |                   |            |
|---------------------|------------|-------------------|------------|
| Cd(2)-O(9)          | 2.330(3)   | Cd(2)-O(10)       | 2.309(4)   |
| Cd(2)-N(6)          | 2.264(4)   |                   |            |
| O(2)-Cd(1)-O(1)     | 52.56(9)   | O(4)#1-Cd(1)-O(1) | 137.53(8)  |
| O(8)-Cd(1)-O(1)     | 80.54(10)  | O(4)#1-Cd(1)-O(2) | 88.40(9)   |
| O(2)-Cd(1)-O(8)     | 93.07(10)  | O(4)#1-Cd(1)-O(8) | 86.43(10)  |
| N(3)-Cd(1)-O(1)     | 78.59(9)   | N(3)-Cd(1)-O(2)   | 127.53(10) |
| N(3)-Cd(1)-O(4)#1   | 143.41(9)  | N(3)-Cd(1)-O(8)   | 96.91(10)  |
| N(9)-Cd(1)-O(1)     | 107.13(11) | O(2)-Cd(1)-N(9)   | 90.63(10)  |
| O(4)#1-Cd(1)-N(9)   | 86.82(11)  | N(9)-Cd(1)-O(8)   | 172.20(11) |
| N(3)-Cd(1)-N(9)     | 86.22(11)  | O(9)#2-Cd(2)-O(9) | 180.000(1) |
| O(10)-Cd(2)-O(10)#2 | 180.000(1) | N(6)-Cd(2)-N(6)#2 | 180.000(1) |
| O(10)-Cd(2)-O(9)    | 97.63(13)  | N(6)-Cd(2)-O(9)   | 90.07(13)  |
| N(6)-Cd(2)-O(10)    | 86.14(14)  |                   |            |

### 3

|                     |            |                       |            |
|---------------------|------------|-----------------------|------------|
| Cd(1)-O(1)          | 2.285(3)   | Cd(1)-O(2)            | 2.650(4)   |
| Cd(1)-O(10)#1       | 2.459(4)   | Cd(1)-O(11)#1         | 2.414(4)   |
| Cd(1)-O(15)         | 2.265(4)   | Cd(1)-O(16)           | 2.312(4)   |
| Cd(1)-N(3)          | 2.280(4)   | Cd(2)-O(3)            | 2.438(4)   |
| Cd(2)-O(4)          | 2.367(4)   | Cd(2)-O(8)            | 2.261(4)   |
| Cd(2)-O(17)         | 2.372(4)   | Cd(2)-O(18)           | 2.271(4)   |
| Cd(2)-N(9)          | 2.263(4)   | Cd(3)-O(19)           | 2.350(5)   |
| Cd(3)-O(20)         | 2.246(5)   | Cd(3)-O(21)           | 2.280(5)   |
| Cd(3)-O(22)         | 2.299(5)   | Cd(3)-N(6)            | 2.313(5)   |
| Cd(3)-N(12)#2       | 2.265(7)   |                       |            |
| O(1)-Cd(1)-O(2)     | 51.90(12)  | O(1)-Cd(1)-O(10)#1    | 135.95(13) |
| O(1)-Cd(1)-O(11)#1  | 82.62(12)  | O(15)-Cd(1)-O(1)      | 87.95(14)  |
| O(1)-Cd(1)-O(16)    | 89.37(13)  | O(10)#1-Cd(1)-O(2)    | 171.75(12) |
| O(11)#1-Cd(1)-O(2)  | 134.03(11) | O(15)-Cd(1)-O(2)      | 93.91(14)  |
| O(16)-Cd(1)-O(2)    | 83.50(14)  | O(11)#1-Cd(1)-O(10)#1 | 53.44(12)  |
| O(15)-Cd(1)-O(10)#1 | 89.27(14)  | O(16)-Cd(1)-O(10)#1   | 93.48(14)  |
| O(15)-Cd(1)-O(11)#1 | 90.29(14)  | O(16)-Cd(1)-O(11)#1   | 90.52(14)  |
| O(15)-Cd(1)-O(16)   | 177.07(13) | N(3)-Cd(1)-O(1)       | 139.89(14) |
| N(3)-Cd(1)-O(2)     | 88.00(14)  | N(3)-Cd(1)-O(10)#1    | 84.06(14)  |
| N(3)-Cd(1)-O(11)#1  | 136.87(13) | O(15)-Cd(1)-N(3)      | 96.84(15)  |
| N(3)-Cd(1)-O(16)    | 84.47(14)  | O(4)-Cd(2)-O(3)       | 54.05(12)  |
| O(8)-Cd(2)-O(3)     | 138.99(13) | O(17)-Cd(2)-O(3)      | 96.61(14)  |
| O(18)-Cd(2)-O(3)    | 87.23(15)  | O(8)-Cd(2)-O(4)       | 85.89(13)  |
| O(4)-Cd(2)-O(17)    | 88.61(15)  | O(18)-Cd(2)-O(4)      | 96.30(16)  |
| O(8)-Cd(2)-O(17)    | 90.07(15)  | O(8)-Cd(2)-O(18)      | 89.14(15)  |
| O(18)-Cd(2)-O(17)   | 174.96(16) | N(9)-Cd(2)-O(3)       | 88.61(14)  |
| N(9)-Cd(2)-O(4)     | 141.44(15) | O(8)-Cd(2)-N(9)       | 132.28(15) |
| N(9)-Cd(2)-O(17)    | 86.40(16)  | N(9)-Cd(2)-O(18)      | 90.45(16)  |
| O(20)-Cd(3)-O(19)   | 91.9(2)    | O(21)-Cd(3)-O(19)     | 174.7(2)   |
| O(22)-Cd(3)-O(19)   | 83.3(2)    | O(20)-Cd(3)-O(21)     | 89.1(2)    |

|                     |           |                     |          |
|---------------------|-----------|---------------------|----------|
| O(20)-Cd(3)-O(22)   | 87.6(2)   | O(21)-Cd(3)-O(22)   | 91.6(2)  |
| N(6)-Cd(3)-O(19)    | 91.63(19) | O(20)-Cd(3)-N(6)    | 172.9(2) |
| O(21)-Cd(3)-N(6)    | 86.87(19) | O(22)-Cd(3)-N(6)    | 86.7(2)  |
| N(12)#2-Cd(3)-O(19) | 84.5(3)   | O(20)-Cd(3)-N(12)#2 | 94.4(2)  |
| N(12)#2-Cd(3)-O(21) | 100.6(3)  | N(12)#2-Cd(3)-O(22) | 167.7(3) |
| N(12)#2-Cd(3)-N(6)  | 92.1(2)   |                     |          |

Symmetry transformations used to generate equivalent atoms: #1 -x+3, -y+3, -z+1; #2 x+1, y, z for **1**; #1 x-1, y, z; #2 -x+3, -y+1, -z+1 for **2**; #1 x+1, y, z+1; #2 x+2, y, z+1 for **3**.

**Table S2** Hydrogen bonds for **1**, **2** and **3** (Å and °).

| D-H...A                           | d(D-H)    | d(H...A)  | D(D...A)  | <(DHA)    |
|-----------------------------------|-----------|-----------|-----------|-----------|
| <b>1</b>                          |           |           |           |           |
| O(8)-H(1W)...O(12) <sup>i</sup>   | 0.86(2)   | 1.88(3)   | 2.731(13) | 174(15)   |
| O(8)-H(2W)...O(14)                | 0.87(2)   | 1.90(6)   | 2.708(12) | 155(13)   |
| O(9)-H(3W)...O(5) <sup>ii</sup>   | 0.84(2)   | 1.89(4)   | 2.714(8)  | 166(15)   |
| O(9)-H(5W)...O(10) <sup>iii</sup> | 0.83(2)   | 1.97(2)   | 2.737(10) | 152(5)    |
| O(10)-H(5W)...O(4) <sup>iv</sup>  | 0.89(2)   | 2.24(8)   | 2.883(9)  | 129(8)    |
| O(10)-H(6W)...O(12) <sup>v</sup>  | 0.89(2)   | 2.50(2)   | 2.945(14) | 111(2)    |
| <b>2</b>                          |           |           |           |           |
| O(8)-H(1W)...O(4) <sup>i</sup>    | 0.888(19) | 2.03(3)   | 2.800(4)  | 145(3)    |
| O(8)-H(2W)...O(2) <sup>ii</sup>   | 0.876(19) | 1.90(2)   | 2.749(4)  | 164(4)    |
| O(9)-H(3W)...O(11) <sup>iii</sup> | 0.889(18) | 1.84(2)   | 2.713(5)  | 166(3)    |
| O(9)-H(4W)...O(7) <sup>iv</sup>   | 0.860(18) | 2.52(3)   | 3.317(7)  | 155(3)    |
| O(10)-H(5W)...O(7) <sup>iv</sup>  | 0.859(19) | 1.84(2)   | 2.643(5)  | 155(4)    |
| O(10)-H(6W)...O(12) <sup>v</sup>  | 0.873(19) | 1.88(2)   | 2.752(5)  | 173(4)    |
| O(11)-H(7W)...O(3)                | 0.916(18) | 1.85(2)   | 2.742(4)  | 165(4)    |
| O(11)-H(8W)...O(5) <sup>i</sup>   | 0.910(19) | 1.86(2)   | 2.759(5)  | 170(4)    |
| O(12)-H(9W)...O(1)                | 0.907(18) | 2.10(2)   | 2.998(5)  | 169(4)    |
| O(12)-H(10W)...O(5) <sup>i</sup>  | 0.911(19) | 2.22(3)   | 3.026(6)  | 148(3)    |
| <b>3</b>                          |           |           |           |           |
| O(15)-H(1W)...O(3) <sup>a</sup>   | 0.869(19) | 1.918(19) | 2.662(5)  | 143(2)    |
| O(15)-H(2W)...O(24)               | 0.871(19) | 2.03(2)   | 2.715(6)  | 135(3)    |
| O(16)-H(3W)...O(8) <sup>b</sup>   | 0.892(19) | 1.92(4)   | 2.692(6)  | 144(5)    |
| O(16)-H(4W)...O(4) <sup>b</sup>   | 0.876(19) | 2.05(4)   | 2.723(5)  | 133(5)    |
| O(17)-H(5W)...O(11) <sup>c</sup>  | 0.876(19) | 2.26(3)   | 2.811(5)  | 121(3)    |
| O(17)-H(6W)...N(9)                | 0.881(19) | 2.52(2)   | 3.174(6)  | 131.1(17) |
| O(18)-H(7W)...O(10) <sup>d</sup>  | 0.891(19) | 2.14(3)   | 2.767(5)  | 127(3)    |
| O(18)-H(8W)...O(23) <sup>a</sup>  | 0.892(19) | 1.84(2)   | 2.728(6)  | 172(6)    |
| O(19)-H(9W)...N(12) <sup>e</sup>  | 0.896(19) | 2.49(4)   | 3.104(12) | 126(3)    |
| O(19)-H(10W)...N(5) <sup>f</sup>  | 0.90(2)   | 2.57(5)   | 3.11(3)   | 119(4)    |
| O(20)-H(11W)...O(26) <sup>g</sup> | 0.89(2)   | 1.99(3)   | 2.765(12) | 145(5)    |
| O(20)-H(12W)...O(24) <sup>h</sup> | 0.891(19) | 1.98(2)   | 2.865(8)  | 171(7)    |
| O(21)-H(13W)...O(25) <sup>g</sup> | 0.88(2)   | 1.88(2)   | 2.757(9)  | 170(7)    |

|                                  |           |         |           |        |
|----------------------------------|-----------|---------|-----------|--------|
| O(21)-H(14W)··O(27) <sup>i</sup> | 0.88(2)   | 2.03(4) | 2.861(10) | 157(7) |
| O(22)-H(15W)··N(2) <sup>j</sup>  | 0.91(2)   | 1.97(3) | 2.841(7)  | 162(6) |
| O(22)-H(16W)··O(6) <sup>h</sup>  | 0.89(2)   | 1.92(3) | 2.780(6)  | 162(7) |
| O(23)-H(17W)··O(13) <sup>b</sup> | 0.89(2)   | 2.46(3) | 3.211(12) | 142(4) |
| O(23)-H(17W)··O(12) <sup>b</sup> | 0.89(2)   | 2.56(4) | 3.373(13) | 152(5) |
| O(23)-H(18W)··O(9) <sup>i</sup>  | 0.88(2)   | 1.92(3) | 2.756(7)  | 158(6) |
| O(24)-H(19W)··O(7) <sup>k</sup>  | 0.886(19) | 1.96(2) | 2.814(6)  | 161(4) |
| O(24)-H(20W)··O(2) <sup>a</sup>  | 0.893(19) | 1.87(3) | 2.709(6)  | 155(5) |

Symmetry transformations used to generate equivalent atoms: i  $-x+2, -y+3, -z+1$ ; ii  $-x+2, -y+2, -z+1$ ; iii  $x+1, y+1, z$ ; iv  $-x, -y+1, -z+1$ ; v  $-x+1, -y+2, -z+1$  for **1**; i  $-x+2, -y+1, -z+2$ ; ii  $-x+1, -y+1, -z+2$ ; iii  $-x+3, -y+1, -z+1$ ; iv  $x+1, y, z-1$ ; v  $x+1, y, z$  for **2**; a  $-x+2, -y+1, -z+2$ ; b  $-x+1, -y+1, -z+2$ ; c  $-x, -y+1, -z+1$ ; d  $-x+1, -y+1, -z+1$ ; e  $x+2, y, z+1$ ; f  $-x+4, -y, -z+2$ ; g  $x+1, y-1, z+1$ ; h  $x+1, y-1, z$ ; i  $x+1, y, z+1$ ; j  $-x+3, -y, -z+2$ ; k  $x+1, y, z$  for **3**.

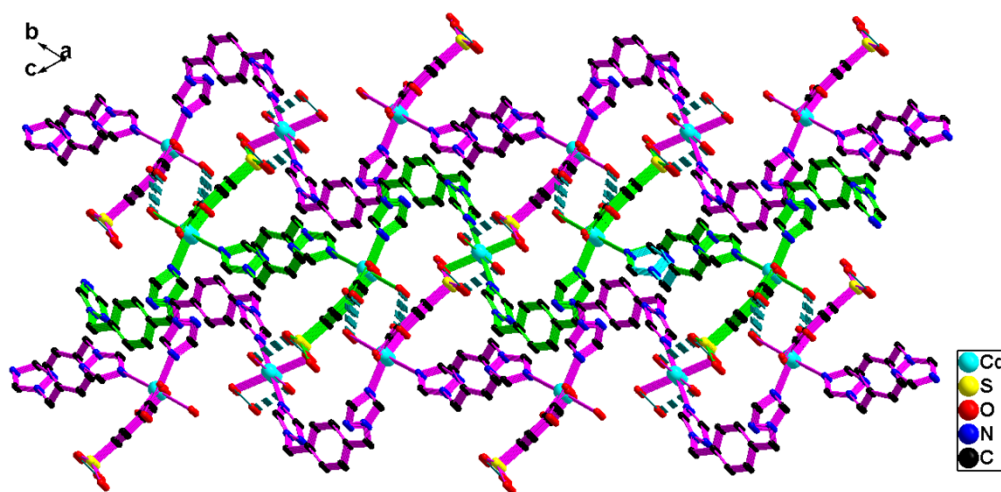

**Fig. S1** A 3D hydrogen bond network in **2**.

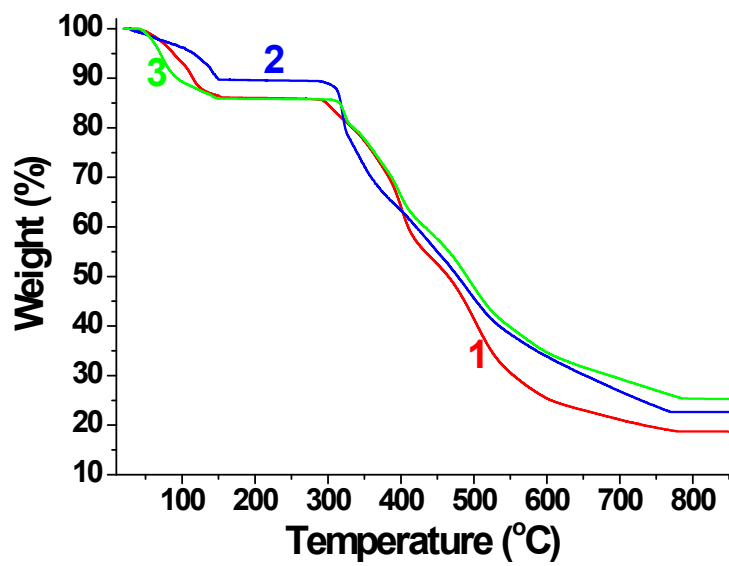

Fig. S2 The TG curves of 1, 2 and 3.
